# Supplementary material for: NK- and T-cell repertoire is established early after allogeneic HSCT and is imprinted by CMV reactivation
Source: PubMed Central journal article supplement — Blood Adv. 2024 Jul 26;8(21):5612–24. doi: 10.1182/bloodadvances.2024013117 (PMC11550366; doi:10.1182/bloodadvances.2024013117), 2024-07-26
Supplement: BLOODA_ADV-2024-013117-mmc1.pdf [file BLOODA_ADV-2024-013117-mmc1.pdf]

1 **Supplementary materials**

2

3 Antonia Schäfer<sup>1</sup>, Zuleika Calderin Sollet<sup>1</sup>, Marie-Priscille Hervé<sup>1</sup>, Stéphane Buhler<sup>1</sup>, Sylvie Ferrari-  
4 Lacraz<sup>1</sup>, Paul J. Norman<sup>3</sup>, Katherine M. Kichula<sup>3</sup>, Ticiana D. J. Farias<sup>4</sup>, Stavroula Masouridi-Levrat<sup>2</sup>,  
5 Anne-Claire Mamez<sup>2</sup>, Amandine Pradier<sup>2</sup>, Federico Simonetta<sup>2</sup>, Yves Chalandon<sup>2</sup>, Jean Villard<sup>1\*</sup>

6

7 <sup>1</sup> *Transplantation Immunology Unit and National Reference Laboratory for Histocompatibility,*  
8 *Department of Diagnostic, Geneva University Hospitals, Geneva, Switzerland*

9 <sup>2</sup> *Service of Haematology, Department of Oncology, Geneva University Hospitals and Faculty of*  
10 *Medicine, University of Geneva, Geneva, Switzerland*

11 <sup>3</sup> *Department of Biomedical Informatics, University of Colorado School of Medicine, Aurora, CO, USA*

12 <sup>4</sup> *Department of Biological Sciences, The University of North Carolina at Charlotte, Charlotte, NC, USA*

13

14 Corresponding author:

15 \*Jean Villard, Transplantation Immunology Unit and National Reference Laboratory for  
16 Histocompatibility, Geneva University Hospitals, Gabrielle-Perret-Gentil 4, 1211 Geneva 4, +41 22 372  
17 93 94/ +41 79 553 34 09, [jean.villard@hcuge.ch](mailto:jean.villard@hcuge.ch)

18

19

20

21

22

23

24

25

26

27

28

29

30

31

1 **Description of supplementary material and methods**

2

3 **Supplementary methods**

4

5 1. Sample collection and processing

6 2. Bulk TCR CDR3 $\beta$  sequencing

7 3. High resolution KIR genotyping

8 4. Spectral flow cytometry immunophenotyping

9 5. TCR data processing

10 6. Identification of public and private TCR clonotypes

11 7. Spectral flow cytometry data preprocessing and gating

12

13

14 **Supplementary tables and figures**

15

16 **Table S1**

17 Description: List of antibodies used for the full spectrum flow cytometry panel

18 **Table S2**

19 Description: Demographic and transplant related characteristics of the study cohort stratified according  
20 to the CMV groups (seronegative, seropositive and reactivated)

21 **Table S3**

22 Description: Post-transplant clinical events and transplant outcomes of the study cohort stratified  
23 according to the CMV groups (seronegative, seropositive and reactivated)

24 **Table S4**

25 Description: HLA restriction and peptide information related to the CMV specific TCR clonotypes

26 **Table S5**

27 Description: Association between TCR/NK cell repertoire reconstitution and different potential  
28 modulatory events

29

30

31 **Table S6**

1 Description: Absolute counts of NK and CD4<sup>+</sup> / CD8<sup>+</sup> T cells in the study cohort (*n* = 47)

2

3 **Figure S1**

4 (A) Description: Study design overview

5 (B) Description: Swimmer plots detailing the patients' clinical course post-HSCT

6

7 **Figure S2**

8 (A) Description: Gating strategy for cleaning and identification of viable CD45<sup>+</sup> immune cells

9 (B) Description: Gating hierarchy for identification of major immune cell subsets

10 **Figure S3**

11 Description: Cumulative productive frequency of pathogen-specific TCR clones identified by *in silico*  
12 matching with public databases at serial timepoints post-HSCT

13 **Figure S4**

14 (A) Description: Cumulative productive frequency of donor-recipient non-shared and shared anti-  
15 CMV specific TCR clones in matched and mismatched CMV reactivated recipients at indicated  
16 timepoints post-HSCT

17 (B) Description: Cumulative productive frequency of donor-recipient non-shared and shared anti-  
18 CMV specific TCR clones according to CMV seropositivity/reactivation

19 serostatus and reactivation.

20 **Figure S5**

21 (A) Description: Proportion of NKp44<sup>+</sup>, NKp30<sup>+</sup>, NKp46<sup>+</sup>, TRAIL<sup>+</sup>, FasL<sup>+</sup>, NKG2D<sup>+</sup>, PD-1<sup>+</sup>, TIGIT<sup>+</sup>  
22 CD56<sup>dim</sup> cell subsets at indicated timepoints post-HSCT

23 (B) Description: Proportion of KIR2DL5<sup>+</sup>, KIR2DS1<sup>+</sup>, KIR2DS4<sup>+</sup>, KIR3DS1<sup>+</sup> CD56<sup>dim</sup> cell subsets  
24 at indicated timepoints post-HSCT

25 **Figure S6**

26 (A) Description: Representative single-cell plots displaying CD56 and CD107a expression  
27 frequency according to stimulation

28 (B) Description: Frequency of CD107a<sup>+</sup> CD56<sup>+</sup> NK cells in unstimulated and stimulated cells

29

30 **Figure S7**

31 (A) Description: CMV peak viral loads in CMV reactivated recipients in relation to the productive  
32 Simpson clonality of the TCR repertoire

1 (B) Description: CMV peak viral loads in CMV reactivated recipients in relation to the frequency of  
2 CD57<sup>+</sup> NKG2C<sup>+</sup> CD56<sup>dim</sup> NK cells at 12 months post-alloHSCT

3

#### 4 **Figure S8**

5 Description: Immune reconstitution of representative CMV seronegative (a.) and CMV reactivated (b.),  
6 (c.) recipients.

7

8

### 9 **Supplementary material and methods**

#### 10 **1. Sample collection and processing**

11 Peripheral blood mononuclear cell (PBMC) isolation was performed by Ficoll density gradient  
12 centrifugation. Briefly, whole blood was first diluted with the equal amount of Phosphate-buffered saline  
13 (PBS), layered onto the Ficoll-Paque (Gibco Life Technologies, Oslo, Norway) and centrifuged at 800 x  
14 g for 20-25 min. Subsequently, PBMCs were isolated from the interface, washed twice with PBS and  
15 cryopreserved in fetal bovine serum supplemented with 10 % dimethyl sulfoxide (Merck, Darmstadt,  
16 Germany). Samples were stored in liquid nitrogen until use. Genomic DNA was extracted from PBMCs  
17 using NucleoSpin kit (Machery-Nagel, Düren, Germany) or directly extracted from the whole blood and  
18 purified using the EZ1 Advanced XL machine (QIAGEN, GmbH, Hilden, Germany). All samples were  
19 stored at 4°C until usage.

#### 20 **2. Bulk TCR CDR3 $\beta$ sequencing**

21 DNA quality and concentration was assessed using *dsDNA* Qubit kit. The starting DNA input  
22 concentration for each sample was between 30 and 44 ng/ $\mu$ l. High-throughput TCR complementary  
23 determining region 3 beta (CDR3 $\beta$ ) sequencing at survey resolution was performed using the  
24 immunoSEQ<sup>®</sup> Assay (Adaptive Biotechnologies, Seattle, WA, USA) according to the manufacturer's  
25 instructions. Briefly, genomic DNA was amplified by a multiplex PCR reaction using forward and reverse  
26 amplification primers targeting all V and J gene segments. TCR pooled libraries were sequenced on an  
27 Illumina MiSeq instrument using v3 150 cycle kit chemistry (Illumina, San Diego, CA, USA).

#### 28 **3. High resolution KIR genotyping**

1 DNA purity and concentration was assessed by Nanodrop 200 spectrophotometer. For library  
2 preparation, 500 ng of genomic DNA was first fragmented by digestive enzymes (New England Biolabs,  
3 Boston, MA, USA) followed by barcode ligation with unique adaptors. After postligation cleanup, dual  
4 size selection was performed with AMPure magnetic beads (Beckmann Coulter, Brea, CA, USA) to  
5 acquire fragment sizes of 800 to 1200 bp length. In a second step, a pool of oligonucleotide probes  
6 specific for KIR and HLA genomic region were used for the targeted capture. Final enriched libraries  
7 were normalized to a concentration of 12 pmol/l. Paired-end sequencing was performed using NovaSeq  
8 instrument with a sequencing length of 2 x 250 bp (Illumina, San Diego, CA, USA).

#### 9 **4. Spectral flow cytometry immunophenotyping**

10 The antibody panel for the immunophenotyping comprised a total of 35 markers. Antibody clones,  
11 concentration, corresponding fluorochromes and supplier are summarized in supplementary Table S1.  
12 Antibody master mix was prepared fresh before each staining experiment. Cryopreserved samples were  
13 quickly thawed in a water-bath at 37°C and washed twice with warm RPMI-1640 (Gibco, Life  
14 Technologies, Oslo Norway) supplemented with 10% fetal bovine serum and – if required – with Pierce  
15 Universal Cell Nuclease (Thermo Scientific™, Waltham, MA, USA). Cells were subsequently  
16 resuspended in RPMI-1640 with 10% fetal bovine serum and rested overnight in a 37°C, 5 % CO<sub>2</sub>  
17 incubator to be revitalized. After overnight resting, samples were washed with PBS by centrifugation at  
18 400 x g for 5 min. Viability staining was performed by adding 5 µl of a 1:500 diluted ViaDye Red viability  
19 staining solution (Cytex® Biosciences, Fremont, CA, USA) to the cells and incubated for 20 min at room  
20 temperatur. Cells were subsequently washed with cell staining buffer (CSB) containing 1% BSA, 0.5 M  
21 EDTA and 0.02% NaNH<sub>3</sub> in PBS. For extracellular staining, Fc receptors were first blocked by adding 5  
22 µl of Fc-receptor blocking (BioLegend, Fell, Germany) solution to each sample followed by 10 min  
23 incubation. Afterwards, 80 µl of antibody master mix were added to the cells and incubated for additional  
24 20 min at 4°C protected from the light. Following two washes with 2 ml of CSB, cells were fixed and  
25 permeabilized for the intracellular staining: To this end, cell were resuspended in 200 µl of Fix/Perm  
26 FoxP3 Solution (Foxp3/Transcription Factor Staining Buffer Set, eBiosciences™, San Diego, CA, USA)  
27 and left for 20 min at room temperature. Cells were then washed twice by pelleting with FoxP3  
28 permeabilization buffer at 800 x g. After fixation and permeabilization, cells were resuspended in 50 µL  
29 of cytoplasmic /intracellular antibody cocktail and incubated for another 20 min at 4°C protected from  
30 the light. Cells were then washed twice by pelleting with CSB and resuspended in 400 µl CSB. On the

1 day of acquisition, cells were finally filtered through a 35 µm nylon mesh filter. Samples were acquired  
2 on a 5-Laser Aurora system (Cytex® Biosciences, Fremont, CA, USA) using the SpectroFlo® Software  
3 v3.1.0. The instrument QC was done a daily basis using SpectroFlo® QC Beads (Lot 2004) following  
4 manufacturers recommendations. Samples were acquired at a high flow rate of ~ 50 µl / sec. For  
5 compensation, cells were unmixed using the stored reference controls with autofluorescence extraction  
6 option selected.

7

## 8 **5. TCR data processing**

9 Raw data processing and sequencing analyses were performed using the immunoSEQ Analyzer 4.0  
10 online platform (<http://www.adaptivebiotech.com/immunoseq>) and in R environment (version 4.1.3, R  
11 Core team, R foundation for statistical computing). At first, raw sequencing datasets were cleaned as  
12 follows: (i) According to the criteria of the International ImMunoGeneTics Collaboration, the TCRβ CDR3  
13 region starts at the second conserved cysteine encoded by the 3' position of the Vβ gene segment and  
14 ends with the conserved phenylalanine encoded by the 5' position of the Jβ gene segment. Thus, all  
15 sequences matching this requirement were kept while all other sequences generating non-productive  
16 events were discarded. (ii) We collapsed sequences with the same CDR3 composition (including  
17 sequences with different V-D-J rearrangements) into the same clonotype and computed to each  
18 clonotype, the sum of the productive frequencies of all the different DNA sequences coding for that same  
19 CDR3.

20 The Simpson clonality was computed as a TCR repertoire diversity marker as follows: *Simpson index* =  
21  $1 - \lambda = 1 - \sum_{i=1}^N p_i^2$ . Output values range from 0 to 1, where values tending to 1 indicating an uneven  
22 with dominant clones distributed repertoire and inversely values tending to 0 a more even polyclonal  
23 repertoire. The degree of overlap in terms of TCR clone identity and abundance was computed using  
24 the Morisita-Horn index, mathematically defined as follows: *Morisita – Horn index* =  $MHI(i) =$   
25  $\frac{2\sum(x_i y_i)}{(D_x + D_y)XY}$ .

## 26 **6. Identification of public and private TCR clonotypes**

27 CDR3aa sequences were used to assess TCR clones publicness. Public TCR CDR3β clonotypes were  
28 either defined as matching clonotypes present in public databases with antigen-specific validated TCR

1 (section 2.8.3) or being present in  $\geq 2$  individuals in our cohort. Identification of identical clonotypes  
2 within a D/R pair were considered as private unless the requirement of full chimerism was not set.

### 3 **7. Spectral flow cytometry data preprocessing and gating**

4 FCS3.0 files were extracted from SpectroFlo® Software v3.1.0 after spectral unmixing and  
5 compensation adjustments. For further downstream analysis, non-randomized data were uploaded in  
6 FlowJo v10.7.2 software (Tree Star, Ashland, OR, USA): (i) the datasets were checked whether they  
7 follow appropriate quality standards using the FlowAI plugin (ii) the datasets were then manually pre-  
8 gated on single, alive, CD45+ immune cells (Supplementary Fig. 2A) (iii) Cell populations of interest  
9 were further identified via manual gating (Supplementary Fig. 2B).

10  
11  
12  
13  
14  
15  
16  
17  
18

**Supplementary table S1.** List of antibodies used for the full spectrum flow cytometry panel

| Target | Fluorochrome  | Antibody clone | Provider       | ug/test | Staining step |
|--------|---------------|----------------|----------------|---------|---------------|
| CD45   | cFluor V547   | HI30           | Cytek custom   | 0.2     | Surface       |
| CD3    | APC/Fire 810  | SK7            | Biolegend      | 0.1     | Surface       |
| CD4    | PE/Fire 640   | SK3            | Biolegend      | 0.1     | Surface       |
| CD8a   | BV570         | RPA-T8         | Biolegend      | 0.4     | Surface       |
| CD19   | BV750         | HIB19          | Biolegend      | 0.4     | Surface       |
| CD14   | BUV805        | M5E2           | BD biosciences | 0.2     | Surface       |
| CD56   | BV785         | 5.1H11         | Biolegend      | 0.05    | Surface       |
| CD16   | BUV496        | 3G8            | BD biosciences | 0.05    | Surface       |
| CD57   | BV605         | QA17A04        | Biolegend      | 0.4     | Surface       |
| NKG2A  | PE-Cy5        | S19004C        | Biolegend      | 0.4     | Surface       |
| NKG2C  | BUV737        | 134591         | BD biosciences | 0.2     | Surface       |
| NKG2D  | cFluor BYG710 | 1D11           | Cytek custom   | 2.5     | Surface       |
| NKp30  | BUV563        | P30-15         | BD biosciences | 1       | Surface       |
| NKp44  | BUV615        | P44-8          | BD biosciences | 1       | Surface       |
| NKp46  | BV711         | 9E2            | BD biosciences | 1       | Surface       |

|                 |                 |         |                |      |                  |
|-----------------|-----------------|---------|----------------|------|------------------|
| KIR2DL1         | PE-Vio 770      | REA284  | Miltenyi       | 1    | Surface          |
| KIR2DL1/ S1     | APC-Vio 770     | REA1010 | Miltenyi       | 1    | Surface          |
| KIR2DL2/ L3 /S2 | BB700           | CH-L    | BD biosciences | 0.4  | Surface          |
| KIR2DL3         | APC             | REA147  | Miltenyi       | 2.5  | Surface          |
| KIR2DL4         | PE              | 181703  | R&D Systems    | 2.5  | Surface          |
| KIR2DL5         | BV421           | UPR1    | BD biosciences | 1    | Surface          |
| KIR2DS4         | PE – Vio 615    | REA860  | Miltenyi       | 2.5  | Surface          |
| KIR3DL1         | VioGreen        | REA1005 | Miltenyi       | 1    | Surface          |
| KIR3DL2         | Alexa Fluor 647 | 539304  | R&D Systems    | 2.5  | Surface          |
| KIR3DL3         | Alexa Fluor 700 | 1136B   | R&D Systems    | 2.5  | Surface          |
| KIR3DL1 / S1    | FITC            | REA168  | Miltenyi       | 1    | Surface          |
| CD107a          | BUV395          | H4A3    | BD biosciences | 0.05 | Intra – cellular |
| TNFa            | BV650           | Mab11   | Biolegend      | 1    | Intra – cellular |
| PD-1            | BUV661          | EH12.1  | BD biosciences | 0.4  | Surface          |
| TIGIT           | cFluor BYG750   | A15153G | Cytek custom   | 1    | Surface          |
| TRAIL           | VioBright B515  | REA1113 | Miltenyi       | 2.5  | Surface          |
| Fas-L           | BV480           | NOK1    | BD biosciences | 1    | Surface          |
| Granzyme B      | Pacific Blue    | GB11    | Biolegend      | 0.2  | Intra – cellular |
| Perforin        | cFluor R685     | DG9     | Cytek custom   | 1    | Intra – cellular |
| Viability       | ViaDyeRed       |         | Cytek custom   |      | Surface          |

1

2 **Table S2.** Demographic and transplant related characteristics of the study cohort stratified according to  
3 CMV the groups (seronegative, seropositive and reactivated)



| Parameter                                        | All (n = 54) | CMV seronegative<br>n = 20 | CMV seropositive<br>n = 20 | CMV reactivation<br>(D-/R+)<br>n = 9 | CMV reactivation<br>(D+/R+)<br>n = 4 |
|--------------------------------------------------|--------------|----------------------------|----------------------------|--------------------------------------|--------------------------------------|
| <b>Recipient age at HSCT in yr (median, IQR)</b> | 57 (62)      | 57 (10)                    | 54 (18)                    | 63 (12)                              | 54.5 (33.5)                          |
| <b>Recipient genre (M:F)</b>                     | 37 : 17      | 15:5                       | 13:8                       | 2:2                                  | 7:2                                  |
| <b>Donor age in yr (median, IQR)</b>             | 41 (21.5)    | 38.5 (26.3)                | 51 (19)                    | 38 (19)                              | 40.5 (5.5)                           |
| <b>Donor genre (M:F)</b>                         | 39 : 15      | 15:5                       | 14:7                       | 7:2                                  | 3:1                                  |
| <b>Underlying diagnosis, n (%)</b>               |              |                            |                            |                                      |                                      |
| AML                                              | 27 (50)      | 8 (40)                     | 10 (47.6)                  | 7 (77.8)                             | 2 (50)                               |
| ALL                                              | 4 (7.4)      | 3 (15)                     | 1 (4.8)                    | -                                    | -                                    |
| AL non specific                                  | 2 (3.7)      | 1 (5)                      | 1 (4.8)                    | -                                    | -                                    |
| CML /CLL                                         | 2 (3.7)      | -                          | 2 (9.5)                    | -                                    | -                                    |
| Lymphoma                                         | 4 (7.5)      | 1 (5)                      | 1 (4.8)                    | 2 (22.2)                             | -                                    |
| Myeloma                                          | 1 (1.9)      | 1 (5)                      | -                          | -                                    | -                                    |
| MDPS /MDS /MPS                                   | 12 (22.2)    | 6 (30)                     | 4 (19)                     | -                                    | 2 (50)                               |
| Hemoglobinopathy                                 | 2 (3.7)      | -                          | 2 (9.5)                    | -                                    | -                                    |
| <b>Donor type, n (%)</b>                         |              |                            |                            |                                      |                                      |
| MUD                                              | 22 (40.7)    | 11 (55)                    | 9 (42.9)                   | 1 (11.1)                             | 1 (25)                               |
| MMUD                                             | 2 (3.7)      | 1 (5)                      | 1 (4.8)                    | -                                    | -                                    |
| MRD                                              | 9 (16.7)     | 5 (25)                     | 4 (19)                     | -                                    | -                                    |
| Haplo-identical                                  | 21 (38.9)    | 3 (15)                     | 7 (33.3)                   | 8 (88.9)                             | 3 (75)                               |
| <b>First transplantation, n (%)</b>              | 49 (90.7)    | 18 (90)                    | 19 (90.5)                  | 8 (88.9)                             | 4 (100)                              |
| <b>Conditioning with ATG, n (%)</b>              | 39 (72.2)    | 15 (75)                    | 15 (71.4)                  | 7 (77.8)                             | 2 (50)                               |
| <b>PTCy, n (%)</b>                               | 22 (40.7)    | 4 (20)                     | 8 (38.1)                   | 8 (88.9)                             | 2 (50)                               |
| <b>No T-cell depletion, n (%)</b>                | 53 (98.1)    | 20 (100)                   | 20 (95.2)                  | 9 (100)                              | 4 (100)                              |
| <b>Cryopreservation, n (%)</b>                   | 43 (79.6)    | 19 (95)                    | 14 (66.7)                  | 6 (66.7)                             | 4 (100)                              |
| <b>Stem cell source, n (%)</b>                   |              |                            |                            |                                      |                                      |
| BM                                               | 3 (5.5)      | -                          | 3 (14.3)                   | -                                    | -                                    |
| PBSC                                             | 51 (94.4)    | 20 (100)                   | 18 (85.7)                  | 9 (100)                              | 4 (100=                              |

| <b>CMV serostatus, <i>n</i> (%)</b>     |           |         |           |          |         |
|-----------------------------------------|-----------|---------|-----------|----------|---------|
| D + /R +                                | 22 (40.7) | -       | 18 (85.7) | -        | 4 (100) |
| D - /R +                                | 12 (22.2) | -       | 3 (14.3)  | 9 (100)  | -       |
| D + /R -                                | 7 (13)    | 7 (35)  | -         | -        | -       |
| D - /R -                                | 13 (24.1) | 13 (65) | -         | -        | -       |
| <b>Disease risk index, <i>n</i> (%)</b> |           |         |           |          |         |
| Low                                     | 4 (7.4)   | -       | 4 (19)    | -        | -       |
| Intermediate                            | 41 (75.9) | 17 (85) | 13 (61.9) | 7 (77.8) | 4 (100) |
| High / very high                        | 7 (13)    | 3 (15)  | 2 (9.5)   | 2 (22.2) | -       |
| NA                                      | 2 (3.7)   | -       | 2 (9.5)   | -        | -       |

1  
2  
3  
4  
5  
6  
7  
8  
9  
10  
11  
12  
13  
14  
15  
16  
17  
18  
19  
20  
21  
22  
23  
24

ALL; acute lymphoblastic leukemia, AML; acute myeloid leukemia, ATG; anti-thymocyte globulin, BM; bone marrow, CLL; chronic lymphoblastic leukemia, CML; chronic myeloid leukemia, CMV; cytomegalovirus, IQR; interquartile range, MDS; myelodysplastic syndrome, MPS; myeloproliferative syndrome, MDPS; myelodysplastic/myeloproliferative syndrome, MMUD; mismatched unrelated donor, MRD; matched related donor, MUD; matched unrelated donor, PBSC; peripheral blood stem cells, PTCy; post-transplant cyclophosphamide

1 **Table S3.** Post-transplant clinical events and transplant outcomes of the study cohort stratified according  
 2 to the CMV groups (seronegative, seropositive and reactivated)

| Parameter                                        | All (n = 54) | CMV seronegative<br>n = 20 | CMV seropositive<br>n = 21 | CMV reactivation<br>(D-/R+)<br>n = 9 | CMV reactivation<br>(D+/R+)<br>n = 4 |
|--------------------------------------------------|--------------|----------------------------|----------------------------|--------------------------------------|--------------------------------------|
| <b>Immunogenic post-transplant complications</b> |              |                            |                            |                                      |                                      |
| aGvHD, n (%)                                     | 40 (74.1)    | 15 (75)                    | 14 (66.7)                  | 8 (88.9)                             | 3 (75)                               |
| > 1 episode within 1-year post-HSCT, n (%)       | 8 (14.8)     | 4 (20)                     | 2 (9.5)                    | 2 (22.2)                             | -                                    |
| Severe aGvHD, grade ≥ III, n (%)                 | 6 (11.1)     | 3 (15)                     | 2 (9.5)                    | -                                    | 1 (25)                               |
| cGvHD, n (%)                                     | 13 (24.1)    | 6 (30)                     | 4 (19)                     | 2 (22.2)                             | 1 (25)                               |
| > 1 episode within 1-year post-HSCT, n (%)       | 2 (3.7)      | 1 (5)                      | -                          | -                                    | 1 (25)                               |
| Moderate to severe cGvHD, n (%)                  | 9 (16.7)     | 4 (20)                     | 3 (14.3)                   | 1 (11.1)                             | 1 (25)                               |
| <b>Infectious post-transplant complications</b>  |              |                            |                            |                                      |                                      |
| <b>Chronic viral infection, n (%)</b>            |              |                            |                            |                                      |                                      |
| CMV                                              | 13 (24)      | -                          | -                          | 9 (100)                              | 4 (100)                              |
| EBV                                              | 11 (20.4)    | 2 (10)                     | 6 (28.6)                   | 1 (11.1)                             | 2 (50)                               |
| HHV-6                                            | 6 (11.1)     | 2 (10)                     | 3 (14.3)                   | 1 (11.1)                             | -                                    |
| HHV-8                                            | 1 (1.9)      | -                          | 1 (4.7)                    | -                                    | -                                    |
| HSV                                              | 3 (5.6)      | 1 (5)                      | 1 (4.7)                    | -                                    | 1 (25)                               |
| BKV                                              | 5 (9.3)      | -                          | 3 (14.3)                   | 2 (22.2)                             | -                                    |
| <b>Respiratory viral infections, n (%)</b>       |              |                            |                            |                                      |                                      |
| Influenza                                        | 5 (9.3)      | 1 (5)                      | 1 (4.7)                    | 3 (33.3)                             | -                                    |
| Sars-Cov2                                        | 16 (29.6)    | 5 (25)                     | 8 (38.1)                   | 1 (11.1)                             | 2 (50)                               |
| RSV                                              | 4 (7.4)      | 2 (10)                     | 2 (9.5)                    | -                                    | -                                    |
| Rhinovirus                                       | 5 (9.3)      | 2 (10)                     | 2 (9.5)                    | 1 (11.1)                             | -                                    |
| <b>Bacterial infections, n (%)</b>               | 26 (48.2)    | 8 (40)                     | 10 (47.6)                  | 6 (66.7)                             | 2 (50)                               |
| <b>Transplant outcomes, n (%)</b>                |              |                            |                            |                                      |                                      |
| Disease relapse                                  | 11 (20.4)    | 4 (20)                     | 4 (19)                     | 3 (33.4)                             | -                                    |
| Overall survival at 1 year post-HSCT             | 50 (92.6)    | 19 (95)                    | 18 (85.7)                  | 9 (100)                              | 4 (100)                              |

1 **Table S4.** HLA restriction and peptide information related to the CMV specific TCR clonotypes

| HLA               | Peptide         | <i>n</i> | frequency   |
|-------------------|-----------------|----------|-------------|
| HLA-A*03:01       | KLGGALQAK       | 12657    | 0,632280947 |
| HLA-A*02          | NLVPMVATV       | 4048     | 0,202218004 |
| HLA-A*02:01       | NLVPMVATV       | 748      | 0,03736637  |
| HLA-C*07:02       | CRVLCYVL        | 430      | 0,021480667 |
| HLA-B*07:02       | TPRVTGGGAM      | 421      | 0,021031072 |
| HLA-DRA1*01       | LLQTGIHVRVSQPSL | 302      | 0,015086422 |
| HLA-C*07:02       | FRCPRRFCF       | 263      | 0,013138176 |
| HLA-B*07:02       | RPHERNGFTVL     | 224      | 0,011189929 |
| HLA-A*01:01       | VTEHDLLY        | 194      | 0,009691278 |
| HLA-B*35:01       | IPSINVHHY       | 93       | 0,004645819 |
| HLA-A*01:01       | YSEHPTFTSQY     | 80       | 0,003996403 |
| HLA-B*44          | NEGVKAAW        | 76       | 0,003796583 |
| HLA-A*02          | MLNIPSINV       | 72       | 0,003596763 |
| HLA-A1            | VTEHDLLY        | 69       | 0,003446898 |
| HLA-A*24:02       | QYDPVAALF       | 43       | 0,002148067 |
| HLA-B*44:03:08    | NEGVKAAW        | 40       | 0,001998202 |
| HLA-B*08:01       | QIKVRVKMV       | 35       | 0,001748426 |
| HLA-A*24:02       | AYAQKIFKI       | 32       | 0,001598561 |
| HLA-DRA1*01       | EHPTFTSQYRIQGKL | 29       | 0,001448696 |
| HLA-A*02:01       | YSEHPTFTSQY     | 22       | 0,001099011 |
| HLA-B*07          | TPRVTGGGAM      | 19       | 0,000949146 |
| HLA-B*08          | QIKVRVDMV       | 14       | 0,000699371 |
| HLA-B*08:01       | ELRRKMMYM       | 13       | 0,000649416 |
| HLA-A*02:01       | VLEETSVML       | 10       | 0,00049955  |
| HLA-B*35          | IPSINVHHY       | 10       | 0,00049955  |
| HLA-B*35:08       | FPTKDVAL        | 10       | 0,00049955  |
| HLA-B*08:01       | QIKVRVDMV       | 9        | 0,000449595 |
| HLA-B7            | TPRVTGGGAM      | 9        | 0,000449595 |
| HLA-A*02          | VLEETSVML       | 6        | 0,00029973  |
| HLA-A2            | NLVPMVATV       | 5        | 0,000249775 |
| HLA-B*18          | ELKRKMIYM       | 5        | 0,000249775 |
| HLA-A*02:01       | ARNLVPMVATVQGGN | 3        | 0,000149865 |
| HLA-A*02:01       | YLEETSVM        | 3        | 0,000149865 |
| HLA-B*08          | ELRRKMMYM       | 3        | 0,000149865 |
| HLA-A*01          | VTEHDLLY        | 2        | 9,99101E-05 |
| HLA-A*02:01       | LSEFCRVLCYVLEE  | 2        | 9,99101E-05 |
| HLA-B*07          | RPHERNGFTVL     | 2        | 9,99101E-05 |
| HLA-B*18          | CVETMCNEY       | 2        | 9,99101E-05 |
| HLA-B*18          | DEEDAIAAY       | 2        | 9,99101E-05 |
| HLA-B*35:08       | CPSQEPMSIYVY    | 2        | 9,99101E-05 |
| HLA-E*01:01:01:03 | VMAPRTLIL       | 2        | 9,99101E-05 |
| HLA-A*01          | VLEETSVML       | 1        | 4,9955E-05  |

|                |                 |   |              |
|----------------|-----------------|---|--------------|
| HLA-A*01       | YSEHPTFTSQY     | 1 | 4,9955E-05 1 |
| HLA-A*02:01    | EDVPSGKLFMHVTLG | 1 | 4,9955E-05 2 |
| HLA-A*02:01:98 | NLVPMVATV       | 1 | 4,9955E-05   |
| HLA-B*07       | RIPHERNGFTV     | 1 | 4,9955E-05 3 |
| HLA-B*12       | EFFWDANDIY      | 1 | 4,9955E-05 4 |
| HLA-B*35:42:01 | IPSINVHHY       | 1 | 4,9955E-05   |

5

6  
7  
8  
9  
10  
11  
12  
13  
14  
15  
16  
17  
18  
19  
20  
21  
22  
23  
24  
25  
26  
27  
28  
29  
30  
31

1 **Table S5.** Association between TCR/NK cell repertoire reconstitution and different potential modulatory  
 2 events within the study cohort ( $n = 54$ )

| Parameter         | PTCy                                                                                                                                                                                                                                                                                             | aGvHD/cGvHD                                                                                                                                                                                                                                                           | Sars-Cov-2                                                                                                |
|-------------------|--------------------------------------------------------------------------------------------------------------------------------------------------------------------------------------------------------------------------------------------------------------------------------------------------|-----------------------------------------------------------------------------------------------------------------------------------------------------------------------------------------------------------------------------------------------------------------------|-----------------------------------------------------------------------------------------------------------|
|                   | $n = 22$ with PTCy<br>$n = 32$ without PTCy                                                                                                                                                                                                                                                      | $n = 43$ with GvHD<br>$n = 11$ without GvHD                                                                                                                                                                                                                           | $n = 16$ with PTCy<br>$n = 38$ without PTCy                                                               |
| TCR clonality     | No significant difference between the groups except at T6 with a higher clonality in PTCy treated recipients ( $p = 0.043$ ).<br><br>Between 3 and 12 months, stable TCR clonality ( $p = 0.29$ ).                                                                                               | No significant difference between these different groups ( $p > 0.05$ ).<br><br>Between 3 and 12 months, significant increase in recipients with GvHD ( $p = 0.0275$ ).                                                                                               | No significant difference between the groups and between 3 and 12 months ( $p > 0.05$ ).                  |
| TCR overlap       | Significant reduced TCR overlap in PTCy treated recipients early post-HSCT ( $t_0$ - $t_3$ , $p = 0.049$ ; $t_3$ - $t_6$ , $p = 0.049$ ).<br><br>At latter timepoints, no significant difference was noted between the groups ( $t_3$ - $t_{12}$ , $p = 0.39$ , $t_9$ - $t_{12}$ , $p = 0.75$ ). | No significant difference between the groups ( $p > 0.05$ ).                                                                                                                                                                                                          | No significant difference between the groups ( $p > 0.05$ ).                                              |
| NK/T cell subsets | Significant higher frequency of CD8 <sup>+</sup> T cells at 12 months in PTCy treated recipients ( $p = 0.015$ ).<br><br>Significant reduced proportion of CD56 <sup>bright</sup> NK cells at 12 months in PTCy treated recipients ( $p = 0.02$ ).                                               | Significant reduced proportion of CD16 <sup>+</sup> CD56 <sup>dim</sup> NK cells at 12 months in GvHD recipients ( $p = 0.0067$ ).<br><br>Significant increase in monocytes CD14 <sup>+</sup> at 6 ( $p = 0.045$ ) and 12 months in GvHD recipients ( $p = 0.0093$ ). | Significant reduced frequency of NK cells at 12 months in Sars-Cov-2 infected recipients ( $p = 0.0485$ ) |

3  
 4 aGvHD; acute graft-versus-host disease, cGvHD; chronic graft-versus-host disease, PTCy; post-transplant  
 5 cyclophosphamide

6  
 7

1 **Table S6.** Absolute counts of NK and CD4<sup>+</sup> / CD8<sup>+</sup> T cells in the study cohort (*n* = 47)

2

| Sample | Timepoint | CD3+ cells | CD4 T - cells | CD8 T - cells | NK cells |
|--------|-----------|------------|---------------|---------------|----------|
| p01    | T03       | 263094     | 62020         | 109808        | 227643   |
| p01    | T06       | 324462     | 86547         | 210836        | 215048   |
| p01    | T09       | 95543      | 17822         | 74315         | 48434    |
| p01    | T0        | 422729     | 309570        | 95769         | 54294    |
| p02    | T03       | 91848      | 65370         | 20393         | 103544   |
| p02    | T06       | 89754      | 68221         | 19287         | 88844    |
| p02    | T12       | 113093     | 59593         | 32259         | 28934    |
| p02    | T0        | 807453     | 542799        | 233852        | 48206    |
| p03    | T03       | 122230     | 21728         | 43086         | 25747    |
| p03    | T06       | 90670      | 16723         | 64314         | 62911    |
| p03    | T09       | 107064     | 21281         | 77442         | 70971    |
| p04    | T03       | 75953      | 39164         | 24037         | 33431    |
| p04    | T06       | 287193     | 60500         | 193684        | 62014    |
| p04    | T09       | 383971     | 107038        | 191291        | 40555    |
| p05    | T03       | 5489       | 3927          | 1458          | 4539     |
| p05    | T06       | 5751       | 2942          | 2575          | 5776     |
| p05    | T09       | 7162       | 3320          | 3479          | 3689     |
| p07    | T03       | 165749     | 159809        | 4628          | 52397    |
| p07    | T06       | 157909     | 103023        | 13404         | 179783   |
| p07    | T09       | 261847     | 180679        | 40901         | 101134   |
| p07    | T12       | 144689     | 94466         | 22791         | 58976    |
| p07    | T0        | 400697     | 302317        | 67540         | 23531    |
| p09    | T03       | 76082      | 18150         | 47572         | 117489   |
| p09    | T06       | 89972      | 24354         | 47722         | 132241   |
| p09    | T12       | 75650      | 19631         | 48971         | 83250    |
| p10    | T03       | 4051       | 811           | 1486          | 50527    |
| p10    | T06       | 81425      | 59793         | 16424         | 57699    |
| p10    | T12       | 5857       | 3871          | 1031          | 1703     |
| p11    | T03       | 21597      | 2383          | 11106         | 13695    |
| p11    | T06       | 106398     | 41918         | 43788         | 56447    |
| p11    | T09       | 93065      | 42748         | 29285         | 59268    |
| p11    | T12       | 225686     | 90311         | 86755         | 76215    |
| p12    | T03       | 39022      | 8129          | 16105         | 27926    |
| p12    | T06       | 31096      | 11441         | 11726         | 2727     |
| p12    | T12       | 21575      | 2784          | 14589         | 4186     |
| p13    | T03       | 432997     | 82727         | 321251        | 42994    |
| p13    | T06       | 473462     | 114716        | 328086        | 73480    |
| p13    | T09       | 45564      | 26968         | 9828          | 22047    |
| p13    | T12       | 418132     | 137397        | 253077        | 67192    |
| p13    | T0        | 294424     | 179721        | 89258         | 34084    |
| p14    | T03       | 23477      | 18902         | 3333          | 25880    |
| p14    | T06       | 340769     | 88474         | 222208        | 82304    |

|     |     |        |        |        |        |
|-----|-----|--------|--------|--------|--------|
| p14 | T12 | 19383  | 3893   | 14547  | 2219   |
| p17 | T03 | 98094  | 60693  | 23446  | 183950 |
| p17 | T06 | 117668 | 23547  | 18185  | 530672 |
| p17 | T09 | 63646  | 48651  | 10420  | 112683 |
| p17 | T12 | 142149 | 76990  | 33095  | 219829 |
| p18 | T06 | 3138   | 2605   | 112    | 1670   |
| p18 | T09 | 8415   | 6080   | 360    | 9173   |
| p19 | T03 | 71375  | 29980  | 35686  | 34045  |
| p19 | T09 | 252263 | 37774  | 183117 | 61218  |
| p19 | T12 | 182217 | 39686  | 128158 | 20714  |
| p19 | T0  | 234019 | 178033 | 44889  | 24114  |
| p20 | T03 | 210766 | 69139  | 87892  | 40218  |
| p20 | T06 | 396341 | 72192  | 189134 | 45924  |
| p20 | T09 | 248377 | 44514  | 110125 | 11546  |
| p20 | T12 | 427469 | 75637  | 235740 | 62850  |
| p20 | T0  | 352118 | 194778 | 101113 | 63124  |
| p21 | T03 | 62973  | 61146  | 908    | 28168  |
| p21 | T09 | 172986 | 54559  | 101058 | 14875  |
| p21 | T12 | 49047  | 27824  | 13881  | 48400  |
| p21 | T0  | 361461 | 216965 | 94604  | 101416 |
| p22 | T03 | 12862  | 3114   | 5008   | 45964  |
| p22 | T12 | 44505  | 11274  | 21994  | 7564   |
| p23 | T03 | 73563  | 38268  | 28304  | 49289  |
| p23 | T06 | 116616 | 84230  | 27922  | 15440  |
| p23 | T09 | 119487 | 75777  | 39339  | 7251   |
| p23 | T12 | 87892  | 59013  | 21815  | 9472   |
| p23 | T0  | 160169 | 93437  | 33874  | 20612  |
| p24 | T03 | 77860  | 43099  | 23167  | 23918  |
| p24 | T09 | 188904 | 44935  | 101407 | 136110 |
| p24 | T12 | 202856 | 69889  | 105677 | 142659 |
| p25 | T03 | 2679   | 720    | 1312   | 118280 |
| p25 | T06 | 266787 | 15082  | 187193 | 51196  |
| p25 | T09 | 460331 | 50207  | 333912 | 78266  |
| p25 | T12 | 378281 | 58136  | 272489 | 17123  |
| p25 | T0  | 545673 | 360047 | 133792 | 64103  |
| p27 | T03 | 23351  | 8286   | 11656  | 88239  |
| p27 | T06 | 137555 | 51599  | 40647  | 98126  |
| p27 | T09 | 160276 | 58344  | 79405  | 113573 |
| p27 | T12 | 40213  | 13910  | 20983  | 18077  |
| p28 | T03 | 127161 | 30231  | 78210  | 65526  |
| p28 | T12 | 287788 | 93382  | 157991 | 43985  |
| p30 | T03 | 55721  | 12597  | 30820  | 46796  |
| p30 | T12 | 203548 | 86528  | 92954  | 20768  |
| p32 | T03 | 10022  | 5967   | 403    | 4089   |
| p32 | T06 | 1393   | 680    | 130    | 655    |
| p32 | T0  | 63098  | 39750  | 18412  | 3318   |



|     |     |        |        |        |        |
|-----|-----|--------|--------|--------|--------|
| p34 | T03 | 19853  | 12854  | 6085   | 214031 |
| p34 | T06 | 18180  | 8807   | 6764   | 28694  |
| p34 | T09 | 101029 | 38327  | 47488  | 64041  |
| p34 | T12 | 225987 | 81963  | 118721 | 175827 |
| p34 | T0  | 202960 | 134161 | 43271  | 37639  |
| p35 | T03 | 327128 | 84631  | 212950 | 20589  |
| p35 | T09 | 514120 | 93212  | 382631 | 26047  |
| p35 | T12 | 462108 | 97810  | 339818 | 36455  |
| p35 | T0  | 332195 | 194985 | 61686  | 75072  |
| p36 | T03 | 4400   | 3134   | 618    | 59987  |
| p36 | T09 | 88182  | 24086  | 55111  | 118589 |
| p36 | T12 | 117559 | 47844  | 55994  | 80544  |
| p36 | T0  | 246898 | 188586 | 50885  | 25662  |
| p37 | T03 | 246845 | 64689  | 105435 | 60467  |
| p37 | T06 | 177777 | 50295  | 92768  | 19616  |
| p37 | T09 | 348585 | 95503  | 200902 | 61437  |
| p37 | T12 | 376810 | 118873 | 214527 | 74913  |
| p37 | T0  | 215739 | 137749 | 57752  | 31961  |
| p38 | T03 | 20162  | 10160  | 5793   | 96279  |
| p38 | T06 | 237302 | 42008  | 100008 | 38563  |
| p38 | T09 | 132948 | 31441  | 68944  | 12770  |
| p39 | T03 | 22108  | 18701  | 2024   | 8310   |
| p39 | T09 | 3216   | 1960   | 662    | 503    |
| p39 | T12 | 159401 | 114539 | 38809  | 13337  |
| p40 | T03 | 4580   | 2271   | 962    | 528    |
| p40 | T06 | 71010  | 34601  | 25318  | 2166   |
| p40 | T12 | 387881 | 185000 | 149620 | 25708  |
| p41 | T03 | 9453   | 1527   | 2952   | 7248   |
| p41 | T06 | 258847 | 43006  | 175467 | 83339  |
| p41 | T12 | 249514 | 90242  | 134902 | 27181  |
| p42 | T06 | 13150  | 4801   | 6109   | 16498  |
| p42 | T12 | 49698  | 23454  | 21400  | 26034  |
| p42 | T0  | 55862  | 28961  | 22785  | 8254   |
| p43 | T03 | 10203  | 3508   | 1439   | 35726  |
| p43 | T06 | 257316 | 14021  | 68119  | 70095  |
| p43 | T09 | 285954 | 36990  | 73786  | 91004  |
| p43 | T12 | 295962 | 74231  | 108200 | 50126  |
| p44 | T06 | 12943  | 5975   | 3894   | 2056   |
| p44 | T12 | 331116 | 141680 | 155674 | 53608  |
| p44 | T0  | 50099  | 22107  | 21503  | 8727   |
| p45 | T03 | 154404 | 49067  | 85459  | 76956  |
| p45 | T06 | 84767  | 26532  | 46076  | 11116  |
| p45 | T12 | 202913 | 55066  | 123126 | 24928  |
| p47 | T03 | 28456  | 22186  | 4375   | 14039  |
| p47 | T06 | 41728  | 28115  | 11915  | 6781   |
| p47 | T09 | 52995  | 33775  | 17995  | 2452   |

|     |     |        |        |        |       |
|-----|-----|--------|--------|--------|-------|
| p48 | T03 | 206113 | 17105  | 113743 | 51914 |
| p48 | T06 | 242572 | 38843  | 153596 | 61852 |
| p48 | T09 | 269283 | 36875  | 188478 | 96328 |
| p48 | T0  | 376273 | 184628 | 141439 | 31090 |
| p49 | T03 | 18315  | 9220   | 6394   | 3156  |
| p49 | T06 | 17663  | 3058   | 7765   | 6713  |
| p49 | T09 | 128245 | 36320  | 76847  | 37633 |
| p49 | T12 | 48047  | 19380  | 23779  | 7543  |
| p49 | T0  | 131243 | 63733  | 42438  | 8613  |
| p50 | T03 | 38236  | 7575   | 21568  | 29622 |
| p50 | T06 | 27492  | 6637   | 12084  | 12878 |
| p50 | T09 | 66818  | 18499  | 38151  | 66406 |
| p50 | T12 | 61996  | 24299  | 30427  | 30126 |
| p52 | T03 | 45715  | 27278  | 14862  | 91698 |
| p52 | T06 | 29930  | 18198  | 7984   | 76376 |
| p52 | T09 | 29423  | 22575  | 4027   | 53120 |
| p53 | T03 | 47030  | 28214  | 12890  | 7365  |
| p53 | T06 | 46827  | 24490  | 13934  | 4034  |
| p53 | T09 | 431502 | 238648 | 138050 | 24892 |
| p53 | T12 | 142678 | 86561  | 45180  | 2798  |
| p55 | T03 | 107422 | 39501  | 60046  | 26500 |
| p55 | T09 | 159123 | 61336  | 83996  | 8559  |
| p55 | T12 | 273310 | 65192  | 178918 | 17227 |
| p59 | T03 | 18576  | 11922  | 3499   | 19598 |
| p59 | T09 | 101015 | 85777  | 11187  | 22302 |
| p59 | T12 | 234907 | 115046 | 64881  | 26412 |
| p61 | T03 | 125145 | 58908  | 34386  | 15040 |
| p61 | T12 | 404667 | 111497 | 220583 | 64000 |
| p66 | T03 | 85143  | 4027   | 43664  | 5936  |
| p66 | T06 | 586291 | 101094 | 306430 | 98920 |
| p66 | T09 | 502321 | 174829 | 260046 | 81323 |
| p66 | T12 | 199037 | 80890  | 91169  | 27526 |

1  
2  
3  
4  
5  
6  
7  
8  
9  
10

1  
2  
3  
4  
5  
6  
7  
8  
9  
10  
11  
12  
13  
14  
15  
16  
17  
18  
19  
20  
21  
22  
23  
24  
25  
26  
27  
28  
29  
30  
31  
32

A

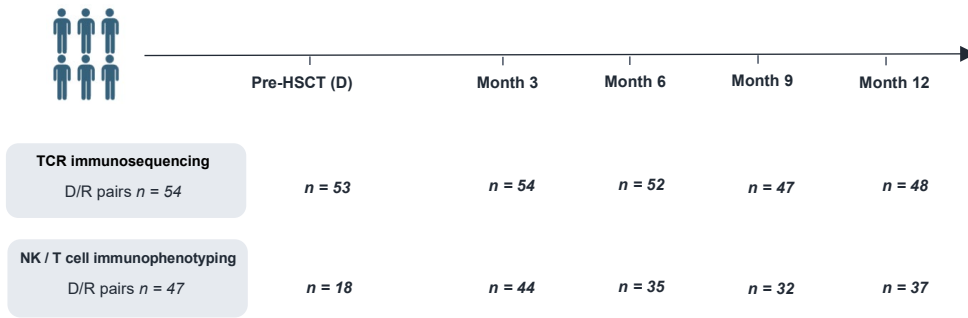

B

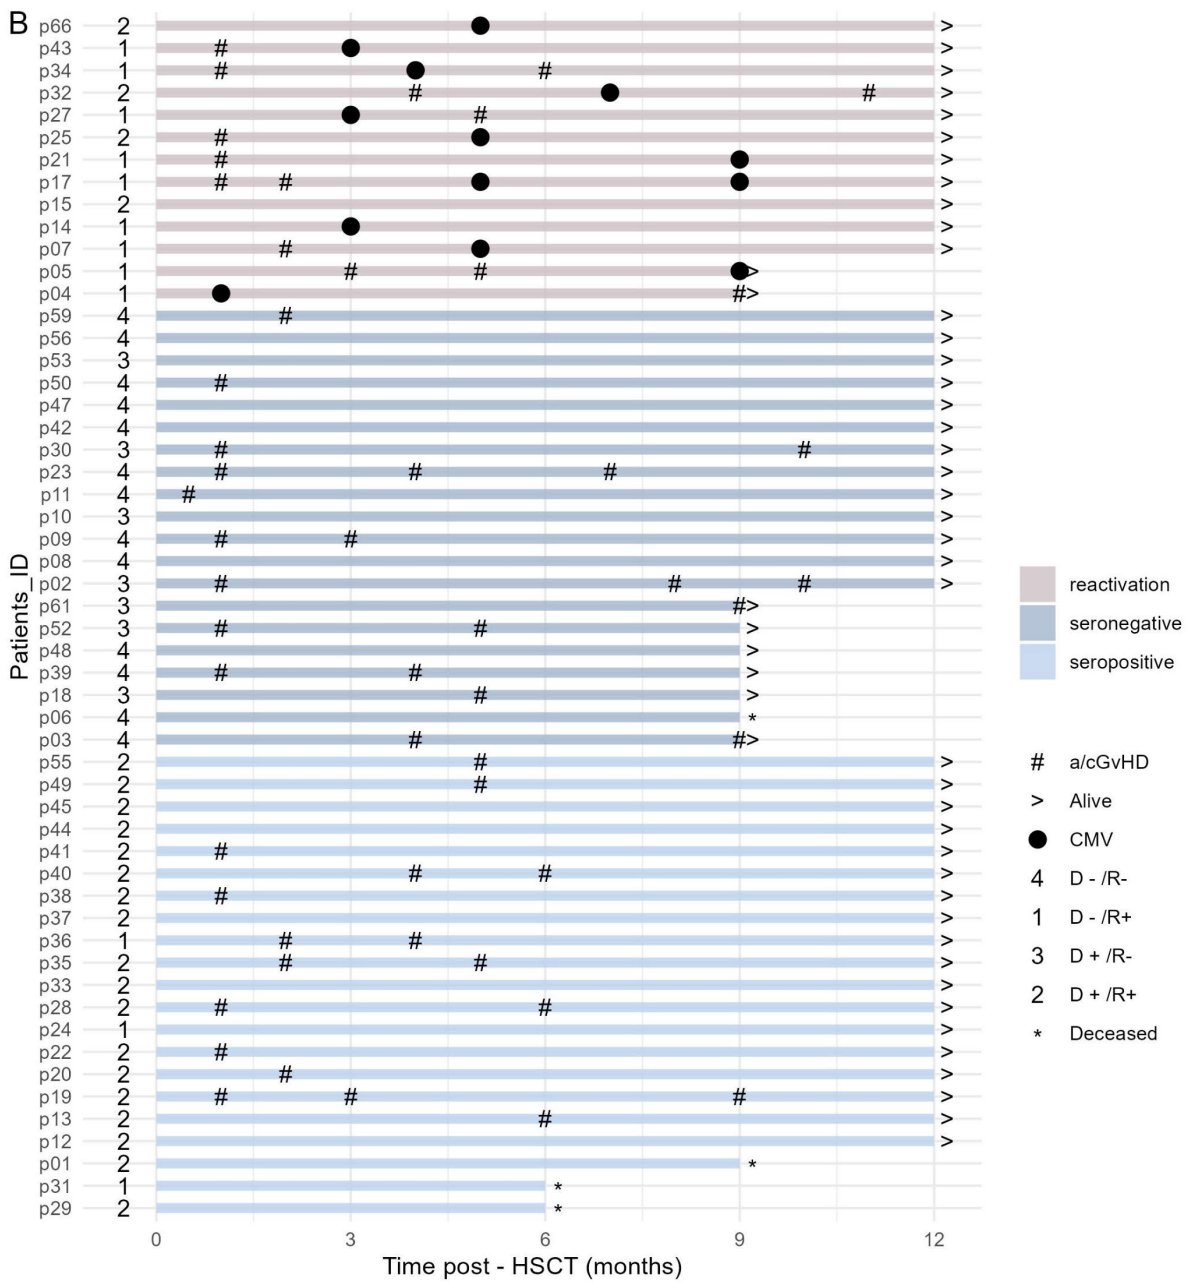

1 **Fig. S1 (A)** Peripheral blood samples derived from five different timepoints (pre-HSCT from the donor  
2 and 3-, 6-, 9-, 12-months from the recipient) were analyzed by spectral flow cytometry and TCR  
3 immunosequencing **(B)** Swimmer plots detailing the patients' clinical course with selective clinical events  
4 and stratified according CMV serostatus and infection/reactivation episodes. Bottom horizontal axis  
5 display months from HSCT and each line represents an HSCT recipient.

6  
7  
8  
9  
10  
11  
12  
13  
14  
15  
16  
17  
18  
19  
20  
21  
22  
23  
24  
25  
26  
27  
28  
29  
30  
31  
32  
33  
34  
35

1  
2  
3  
4  
5  
6  
7  
8  
9  
10  
11  
12  
13  
14  
15  
16  
17  
18  
19  
20  
21  
22  
23  
24  
25  
26  
27  
28

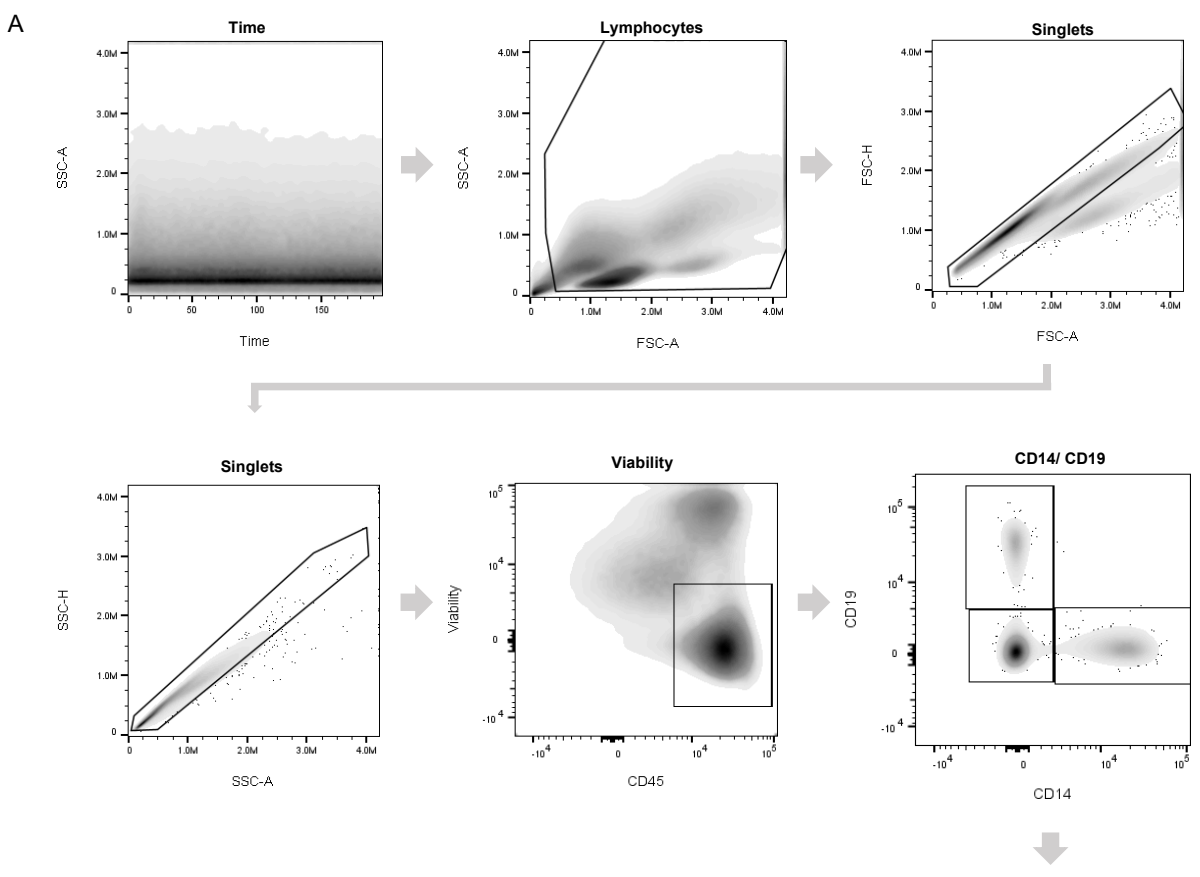

- B**
- Viable CD45+ immune cells
  - > B cells (CD19+)
  - > Monocytes (CD14+)
  - >> Non B-cells/ monocytes
  - >>> T-cells (CD3+)
  - >>>> CD4+ T-cells (CD4+ CD8a-)
  - >>>> CD8+ T-cells (CD4- CD8a+)
  - >>>> CD4+ CD8+ DP T-cells
  - >>>> CD8- CD4- DN T-cells
  - >>> NKT cells (CD3+ CD56+)
  - >>> Non T cells (CD3-)
  - >>>> NK-cells (CD56+ CD16+)
  - >>>>> CD56bright NK-cells (CD56++ CD16+/-)
  - >>>>> CD56dim NK-cells (CD56+ CD16+/-)
  - >>>>> Unconventional NK-cells (CD56- CD16+)

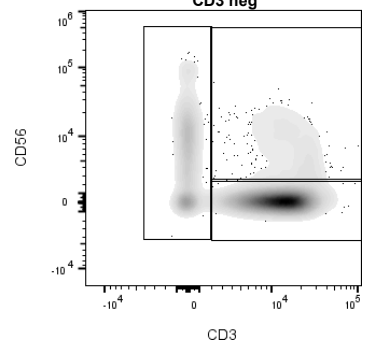

1 **Fig. S2 (A)** Gating strategy for cleaning and identification of viable CD45<sup>+</sup> immune cells **(B)** Gating  
2 hierarchy for identification of major immune cell subsets based on following markers: CD3, CD8a, CD4,  
3 CD19, CD14, CD16 and CD56.

4

5

6

7

8

9

10

11

12

13

14

15

16

17

18

19

20

21

22

23

24

25

26

27

28

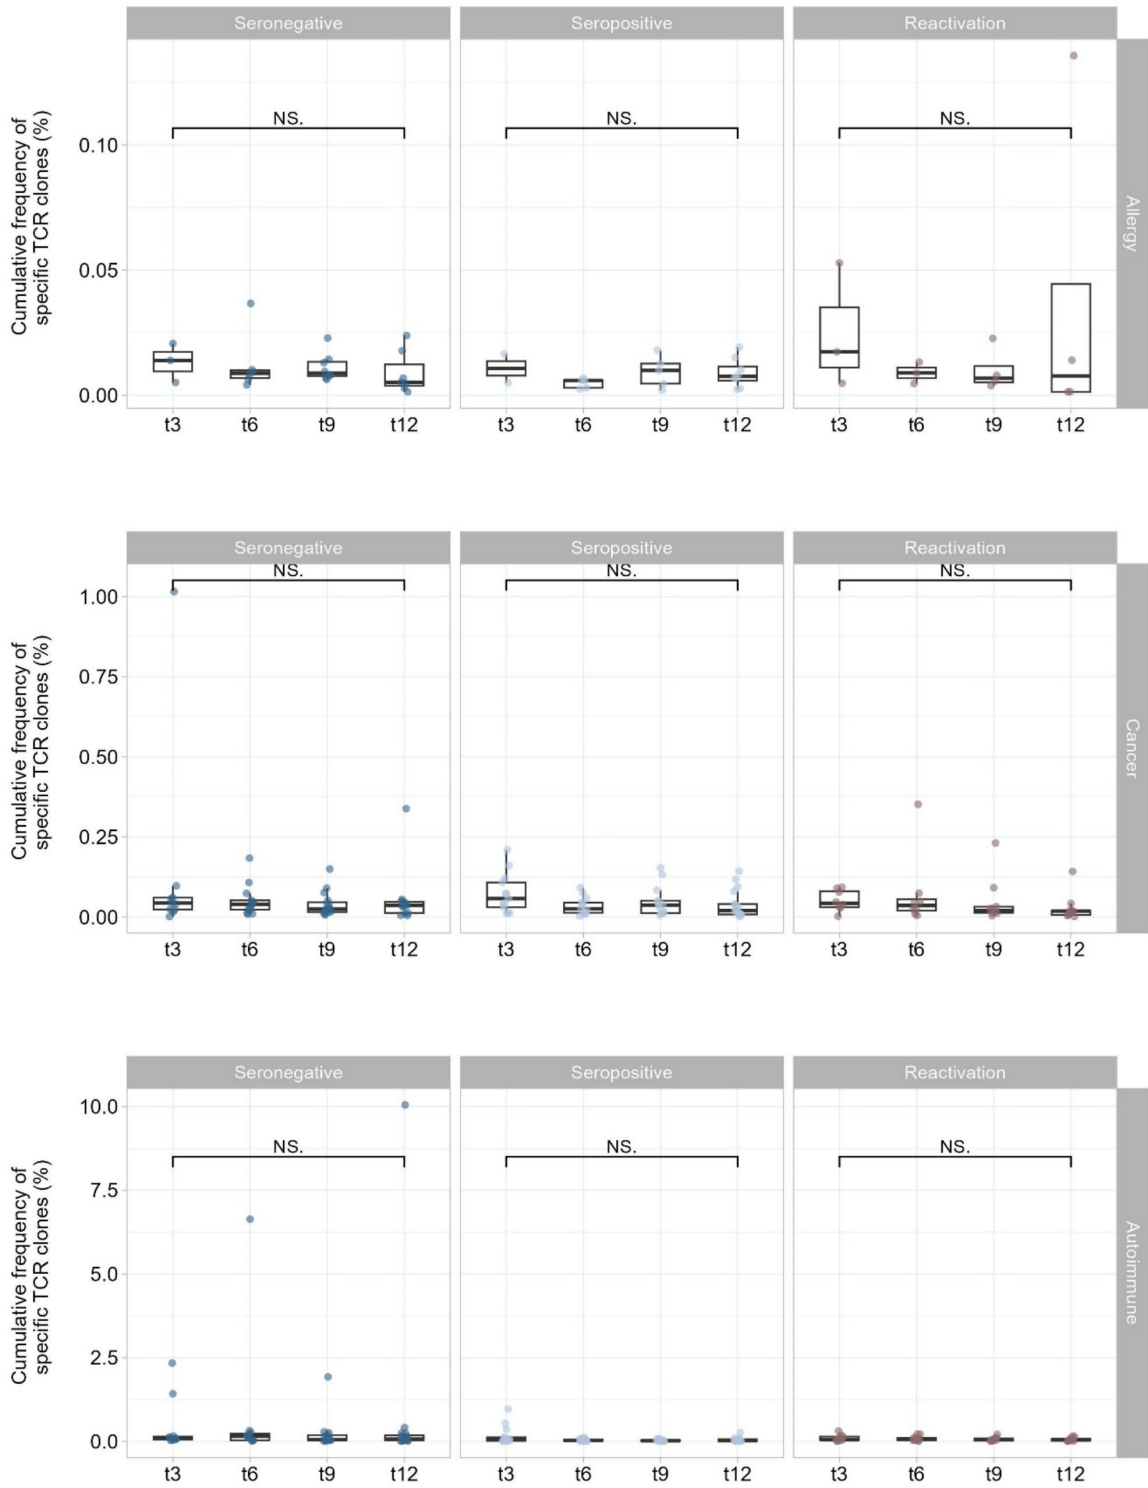

- 1
- 2
- 3
- 4

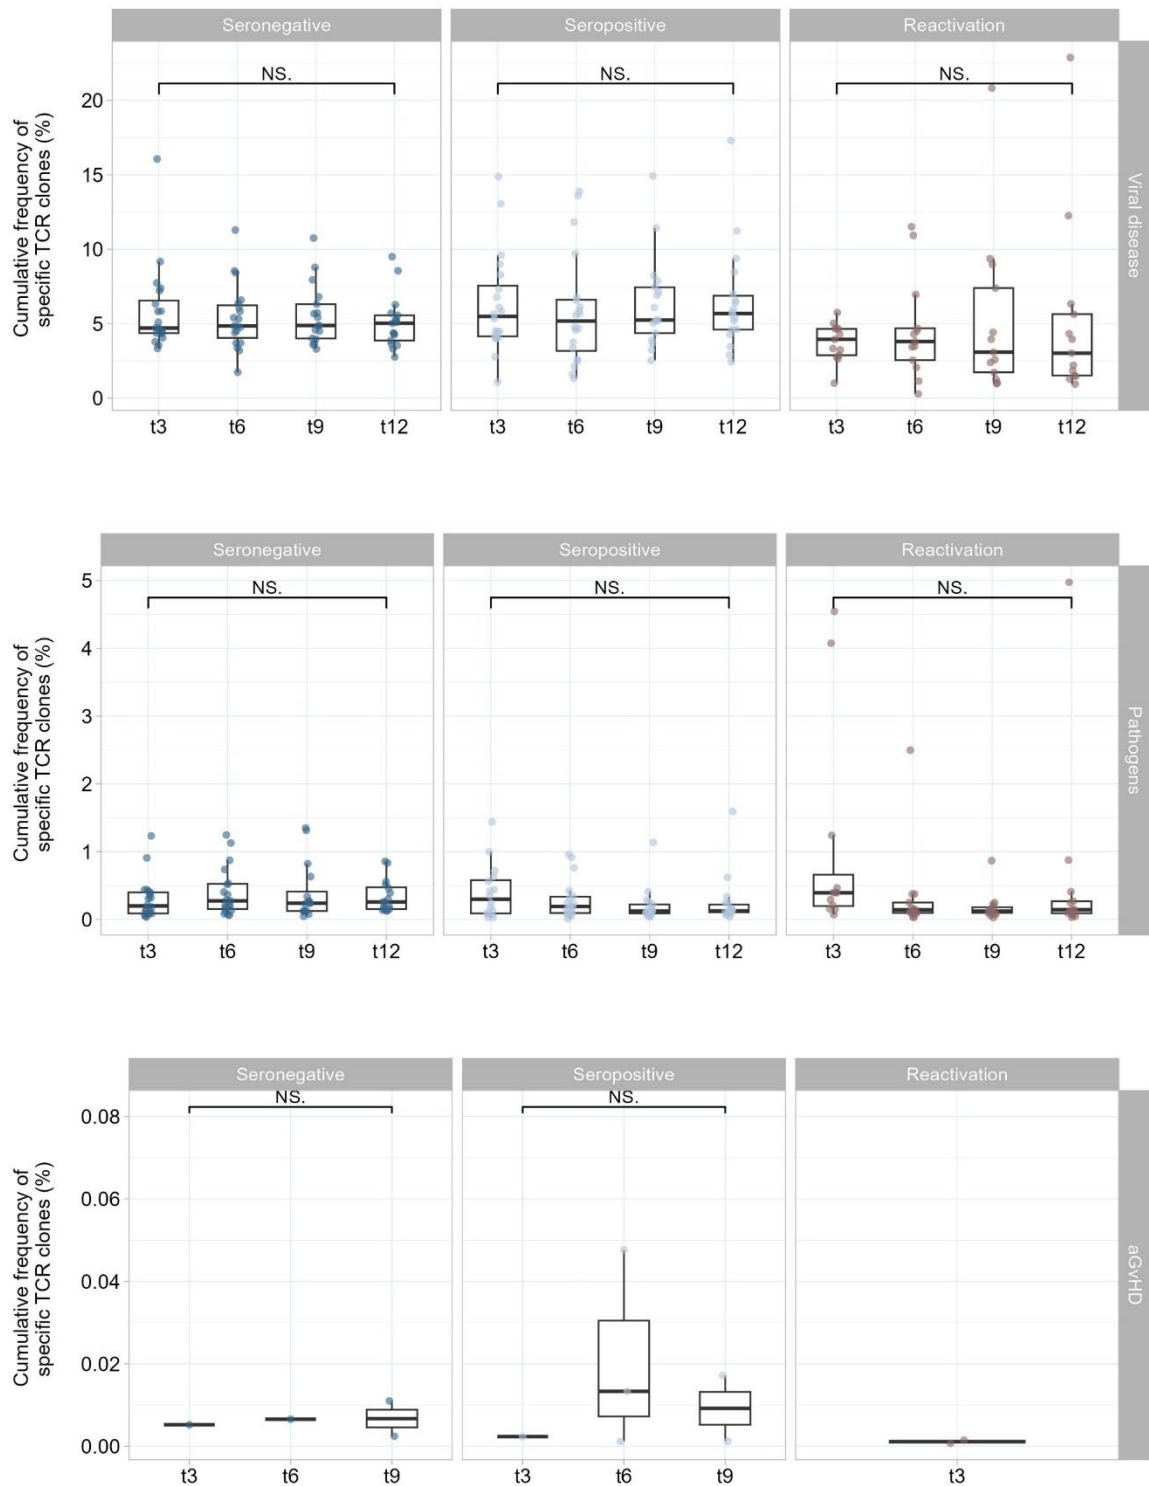

1 **Fig. S3** Cumulative productive frequency of pathogen-specific TCR clones identified by *in silico*  
2 matching with public databases at serial timepoints post-HSCT (t0, n = 53; t3, n = 54; t6, n = 52; t9, n =  
3 47; t12, n = 48). Box plots display medians and interquartile ranges (IQR), with whiskers representing  
4 1.5× IQR. Wilcoxon sum rank test in (A). All p values were 2 sided. Statistical thresholds: (NS) not  
5 significant

6



A

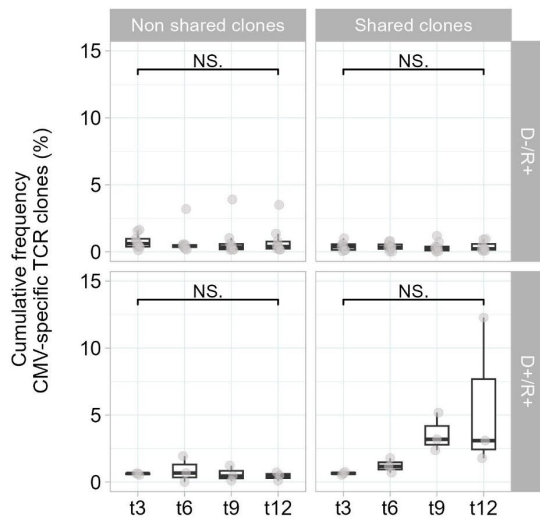

B

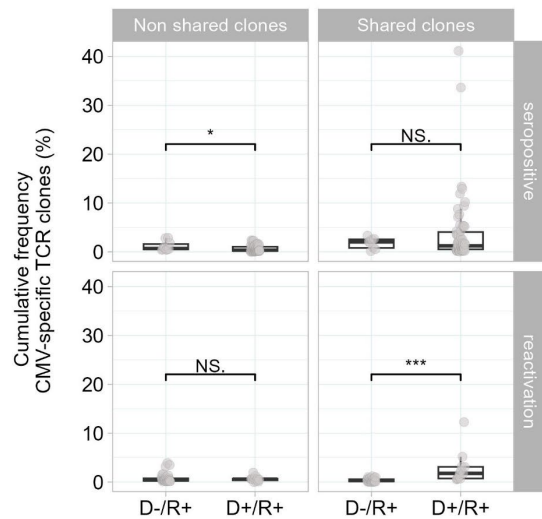

1

2

3

4

5 **Fig. S4** Stratification according to following groups: seronegative ( $n = 20$ ), seropositive ( $n = 21$ ) and  
 6 reactivated ( $n = 13$ ) CMV recipients applies to plot (A) and (B). **(A)** Cumulative productive frequency of  
 7 donor-recipient non-shared and shared CMV- specific TCR clones in D-/R+ ( $n = 9$ ) and D+/R+ ( $n = 4$ )  
 8 CMV reactivated recipients at indicated timepoints post-HSCT. **(B)** Cumulative productive frequency of  
 9 donor-recipient non-shared and shared CMV-specific TCR clones according to CMV serostatus and  
 10 reactivation. Box plots display medians and interquartile ranges (IQR), with whiskers representing  $1.5 \times$   
 11 IQR. Wilcoxon rank sum test in (A), (B). All  $p$  values were 2 sided. Statistical thresholds: (\*)  $p < 0.05$ ,  
 12 (\*\*\*)  $p < 0.001$  and (NS) not significant.

13

14

15

16

17

18

19

20

A

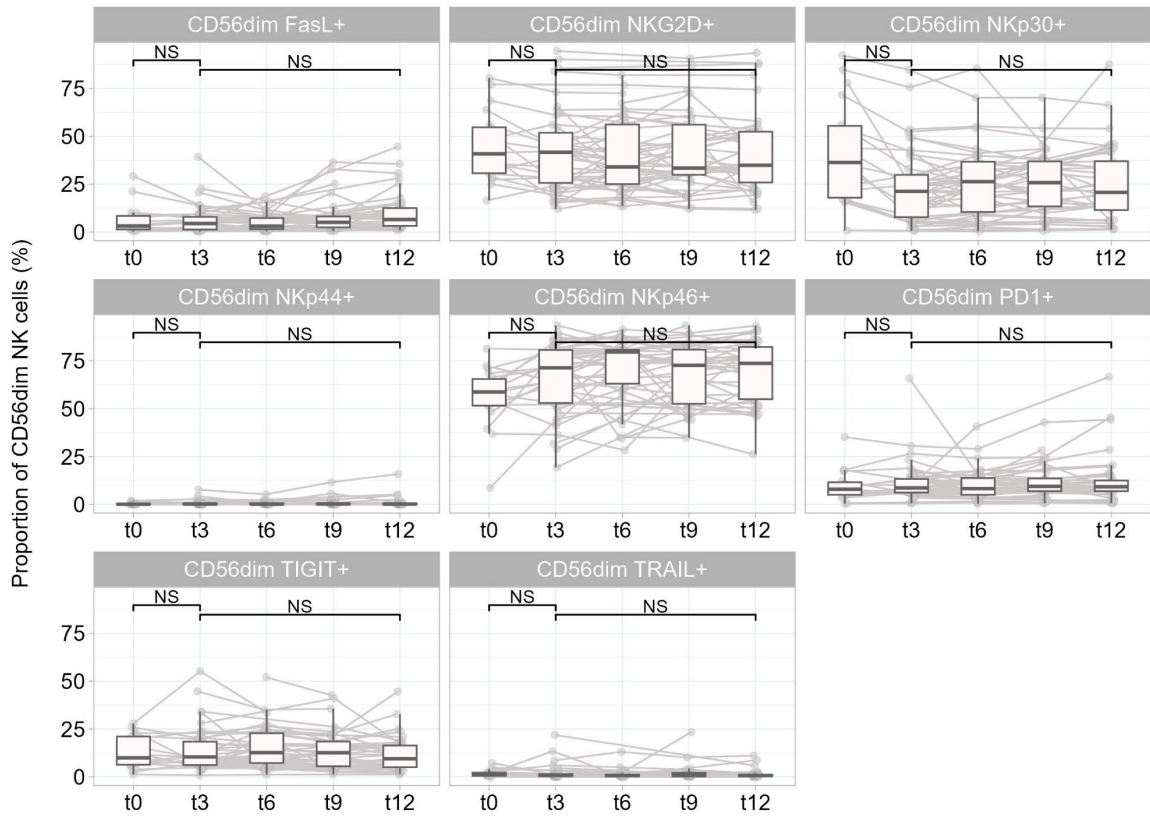

B

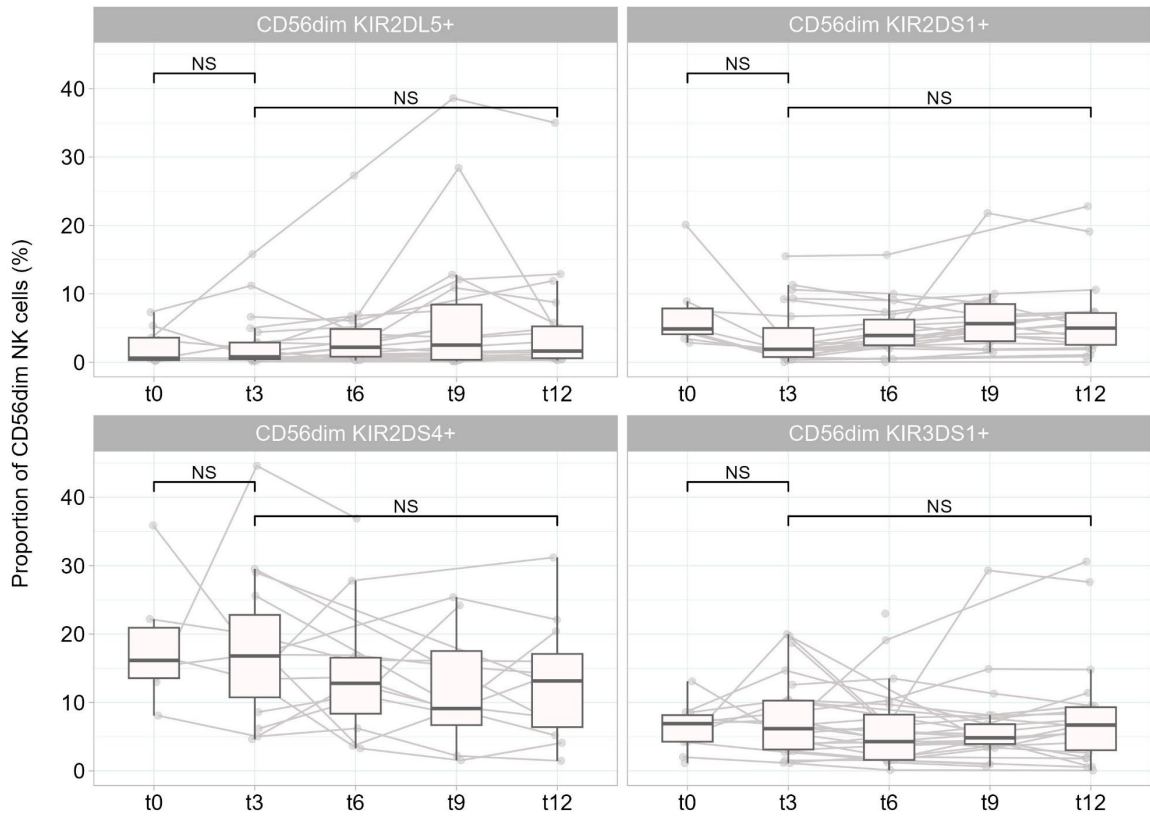

1 **Fig. S5 (A)** Proportion of NKp44<sup>+</sup>, NKp30<sup>+</sup>, NKp46<sup>+</sup>, TRAIL<sup>+</sup>, FasL<sup>+</sup>, NKG2D<sup>+</sup>, PD-1<sup>+</sup>, TIGIT<sup>+</sup> CD56<sup>dim</sup>  
 2 cell subsets at indicated timepoints post-HSCT: t0 (n = 18), t3 (n = 44), t6 (n = 35), t9 (n = 32), t12 (n =  
 3 37). **(B)** Proportion of KIR2DL5<sup>+</sup>, KIR2DS1<sup>+</sup>, KIR2DS4<sup>+</sup>, KIR3DS1<sup>+</sup> CD56<sup>dim</sup> cell subsets at indicated  
 4 timepoints post-HSCT: t0 (n = 18), t3 (n = 44), t6 (n = 35), t9 (n = 32), t12 (n = 37). Lines connect paired  
 5 samples. Box plots display medians and interquartile ranges (IQR), with whiskers representing 1.5×  
 6 IQR. Wilcoxon rank sum test with FDR correction in (A), (B). All *p* values were 2 sided. Statistical  
 7 thresholds: (NS) not significant.

8

9

10

11

12

13

14

15

16

17

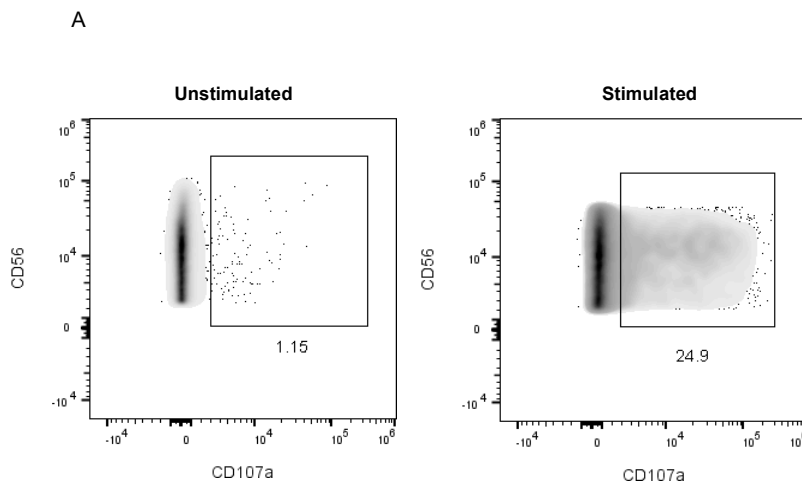

18

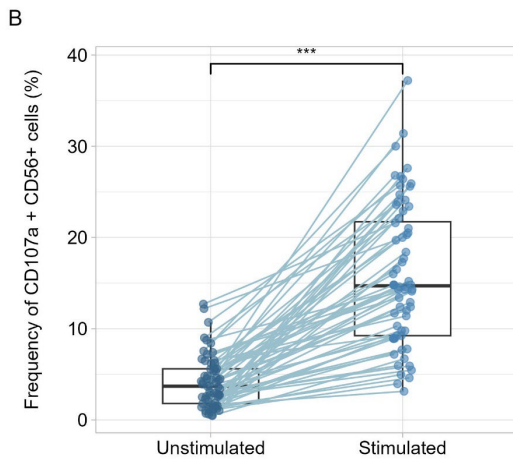

27

28 **Fig. S6 (A)** Representative single-cell plots displaying CD56 and CD107a expression frequency without  
 29 K562 and post-K562 stimulation. **(B)** Frequency of CD107a<sup>+</sup> CD56<sup>+</sup> NK cells in unstimulated and  
 30 stimulated cells. Lines connect paired samples. Box plots display medians and interquartile ranges  
 31 (IQR), with whiskers representing 1.5× IQR. Wilcoxon rank sum test in (B). All *p* values were 2 sided.  
 32 Statistical thresholds: (\*\*\*) *p* < 0.001

33

34

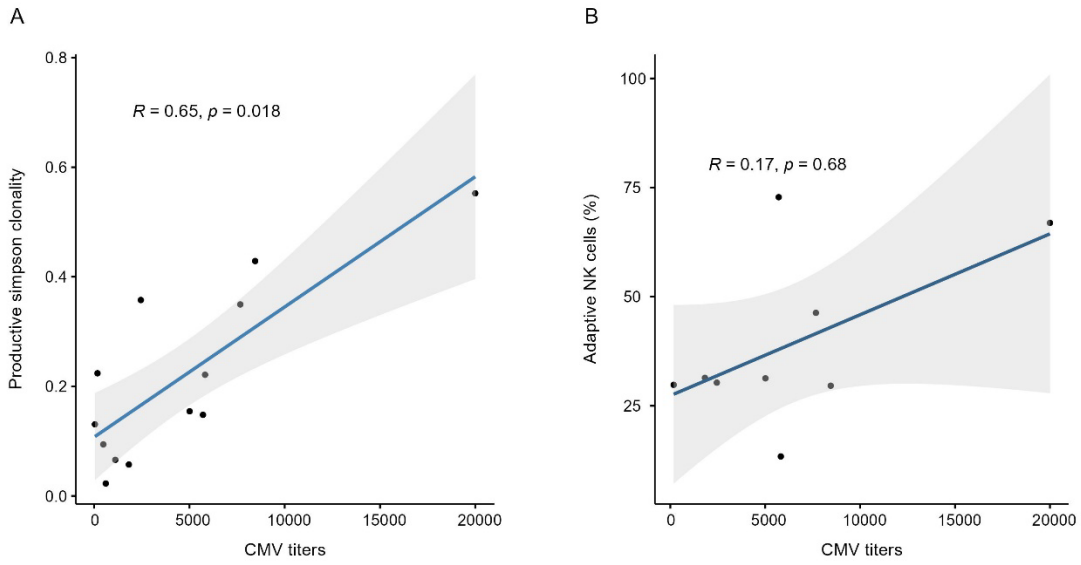

1

2

3 **Fig. S7: (A)** Scatter plot showing CMV peak viral loads in CMV reactivated recipients (x axis) in relation  
 4 to the productive Simpson clonality of the TCR repertoire (y axis) **(B)** Scatter plot showing CMV peak  
 5 viral loads in CMV reactivated recipients (x axis) in relation to the frequency of CD57<sup>+</sup> NKG2C<sup>+</sup> CD56<sup>dim</sup>  
 6 NK cells at 12 months post-alloHSCT (y axis). Spearman rank correlation coefficient is indicated on each  
 7 plot with the corresponding *p*-value.

8

9

10

11

12

13

14

15

16

17

18

19

20

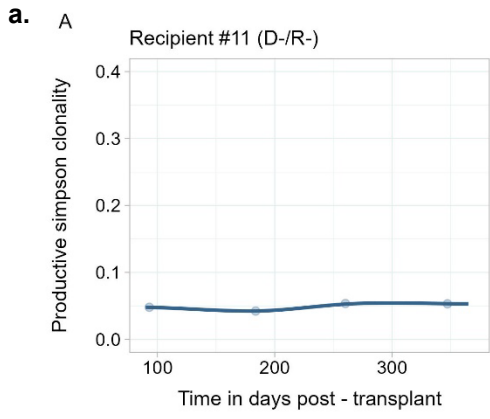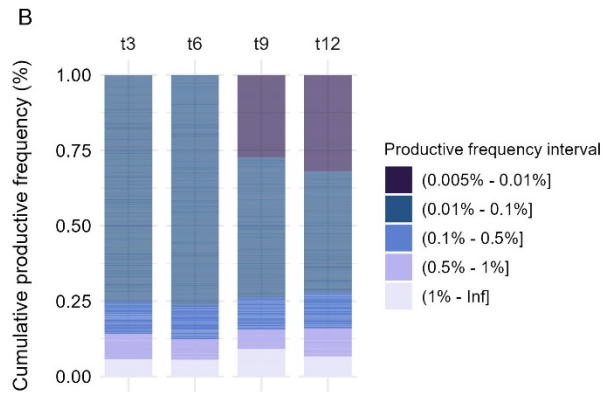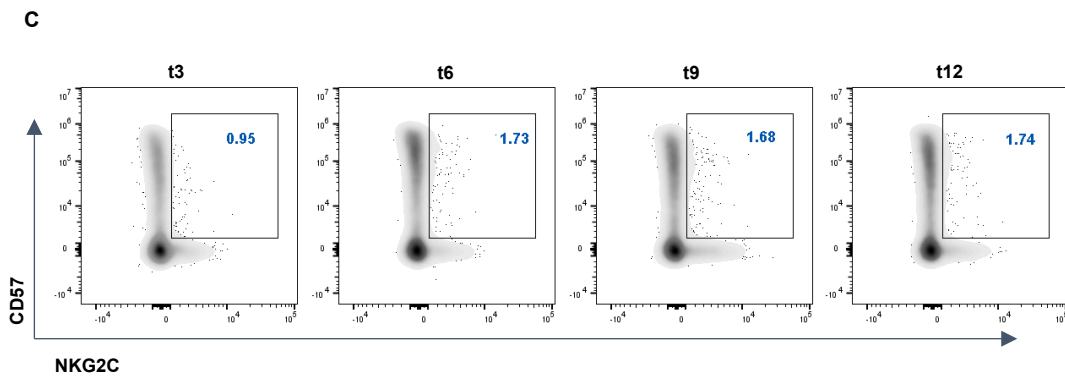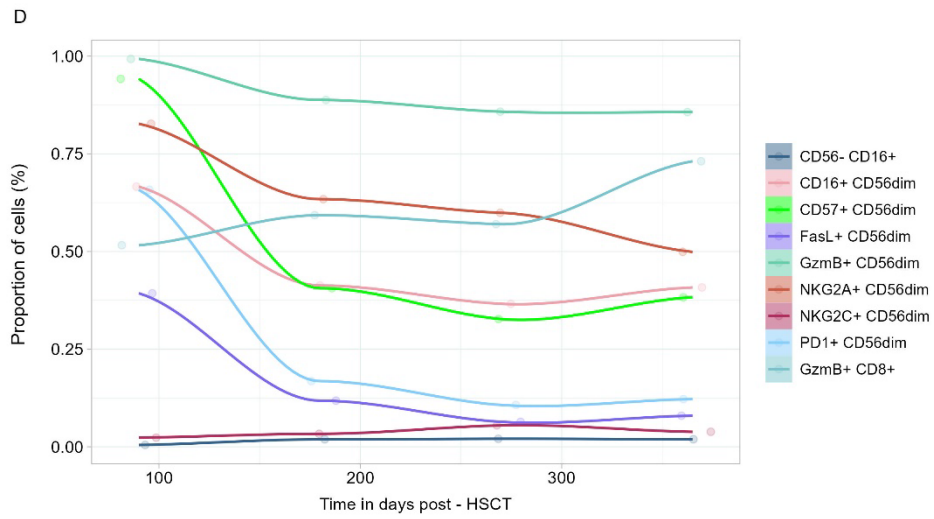

1  
2  
3  
4  
5  
6  
7  
8

17  
18  
19  
20  
21

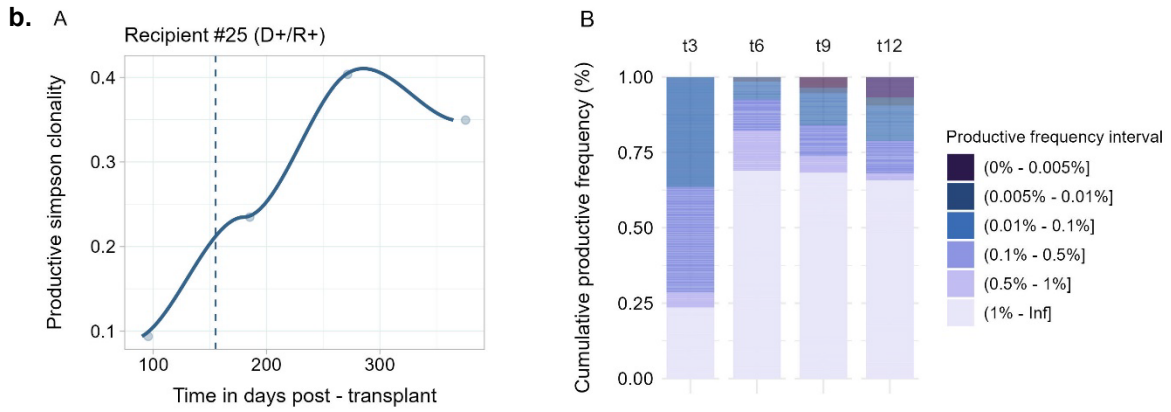

1  
2  
3  
4  
5  
6  
7  
8

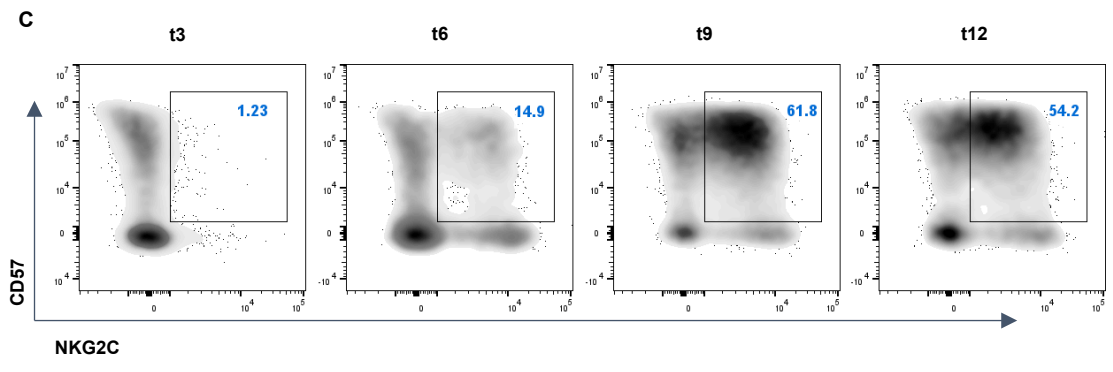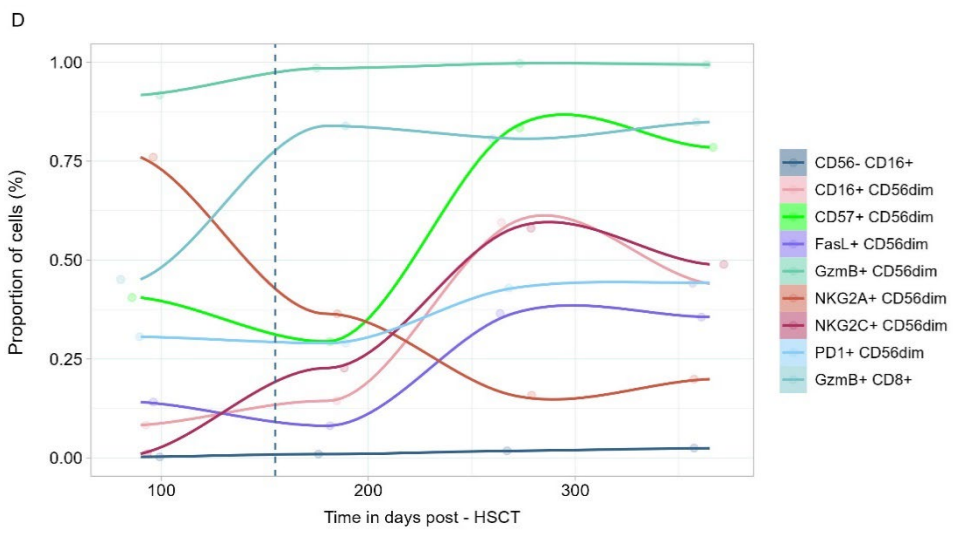

19  
20  
21  
22

1

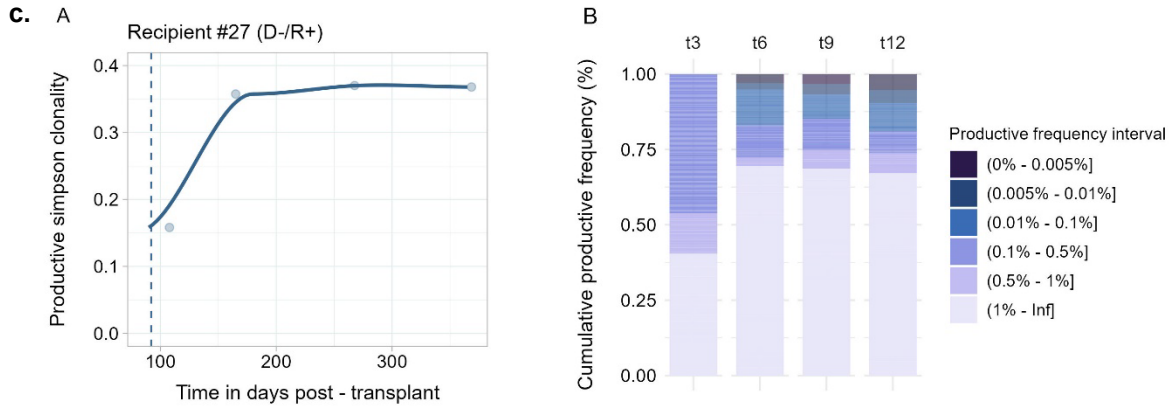

2

3

4

5

6

7

8

9

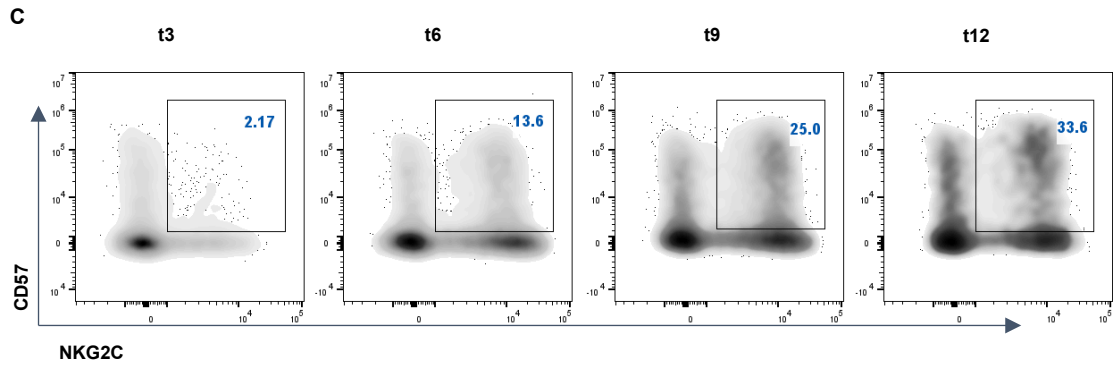

10

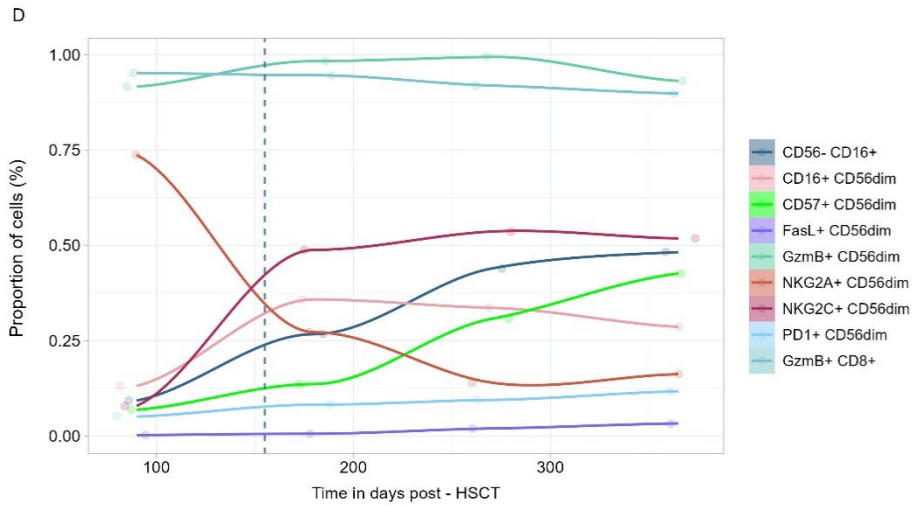

21

22

23

1 **Fig. S8:** Immune reconstitution of representative CMV seronegative (a.) and CMV reactivated (b.), (c.)  
2 recipients. **(A)** Evolution of the TCR repertoire post-alloHSCT based on the productive Simpson clonality  
3 (*y* axis) in a representative recipient. The vertical dotted line represents time of CMV reactivation. **(B)**  
4 TCR fractal clonal size organization defined by the productive frequency of clones at indicated  
5 timepoints. The color-coded legend bar represents the cumulative frequency of clones stratified  
6 according to the individual clone's productive frequency. **(C)** Representative flow cytometry plot of  
7 NKG2C<sup>+</sup> CD57<sup>+</sup> NK cells gated on CD56<sup>dim</sup> NK cells at different timepoints post-alloHSCT. **(D)** Evolution  
8 of the frequency of distinct cell subsets at different timepoints post-alloHSCT. The color-coded legend  
9 represents the distinct cell subsets.

10
